**Title:** Biased M<sub>1</sub> positive allosteric modulators reveal novel role of phospholipase D in M<sub>1</sub>-dependent rodent cortical plasticity

**Summary:** We demonstrate a novel role of phospholipase D in M<sub>1</sub>-dependent rodent cortical plasticity and M<sub>1</sub> PAMs that do not couple to phospholipase D have functionally distinct effects on cortical plasticity than non-biased M<sub>1</sub> PAMs.

**Authors:** Sean P. Moran<sup>1,2,3</sup>, Zixiu Xiang<sup>2,3</sup>, Catherine A. Doyle<sup>3</sup>, James Maksymetz<sup>2,3</sup>, Xiaohui Lv<sup>3</sup>, Sehr Faltin<sup>3</sup>, Colleen M. Niswender<sup>2,3,5</sup>, Jerri M. Rook<sup>1,2,3</sup>, Craig W. Lindsley<sup>2,3,4</sup>, P. Jeffrey Conn<sup>1,2,3,5\*</sup>

**Affiliations:**

<sup>1</sup>Vanderbilt Brain Institute, Vanderbilt University, Nashville, TN 37232

<sup>2</sup>Department of Pharmacology, Vanderbilt University, Nashville, TN 37232

<sup>3</sup>Vanderbilt Center for Neuroscience Drug Discovery, Vanderbilt University, Nashville, TN 37232

<sup>4</sup>Department of Chemistry, Vanderbilt University, Nashville, TN 37232

<sup>5</sup>Vanderbilt Kennedy Center, Vanderbilt University Medical Center, Nashville, TN 37240

\* Corresponding Author

Email: [jeffrey.conn@vanderbilt.edu](mailto:jeffrey.conn@vanderbilt.edu)

## **Abstract**

Highly selective positive allosteric modulators (PAMs) of the M<sub>1</sub> subtype of muscarinic acetylcholine receptor have emerged as an exciting new approach for the potential improvement of cognitive function in patients suffering from Alzheimer's disease and schizophrenia. M<sub>1</sub> PAM discovery programs have produced a structurally diverse range of M<sub>1</sub> PAMs with distinct pharmacological properties, including different levels of agonist activity and differences in signal bias. This includes the recent discovery of novel biased M<sub>1</sub> PAMs that can potentiate coupling of M<sub>1</sub> to activation of phospholipase C but not phospholipase D (PLD). However, little is known about the role of PLD in M<sub>1</sub> signaling in native systems and it is not clear whether biased M<sub>1</sub> PAMs will display differences in modulating M<sub>1</sub>-mediated responses in native tissue. We now report a series of studies using novel PLD inhibitors and PLD knockout mice to show that PLD is necessary for the induction of M<sub>1</sub>-dependent long-term depression (LTD) in the prefrontal cortex (PFC). Importantly, biased M<sub>1</sub> PAMs that do not couple to PLD not only fail to potentiate orthosteric agonist-induced LTD but also block M<sub>1</sub>-dependent LTD in the PFC. In contrast, biased and non-biased M<sub>1</sub> PAMs act similarly in potentiating M<sub>1</sub>-dependent electrophysiological responses that are PLD-independent. These findings demonstrate that PLD plays a critical role in the ability of M<sub>1</sub> PAMs to modulate certain CNS functions and that biased M<sub>1</sub> PAMs function differently in brain regions implicated in cognition.

**Keywords:** Positive allosteric modulator, signal bias, M<sub>1</sub>, muscarinic acetylcholine receptor, mPFC, long-term depression, phospholipase D.

## **Introduction**

The M<sub>1</sub> muscarinic acetylcholine receptor (mAChR) has attracted intense interest as a promising therapeutic target for the treatment of the cognitive disruptions in schizophrenia and Alzheimer's disease (AD). M<sub>1</sub> is highly expressed across many forebrain regions implicated in the pathophysiology of schizophrenia and AD, including the cortex, striatum, and hippocampus (1, 2). Interestingly, dysregulation of the M<sub>1</sub> receptor has been reported within a subset of patients suffering from schizophrenia illustrated by a dramatic reduction of M<sub>1</sub> receptor expression in pyramidal neurons in cortical regions highly implicated in complex behaviors such as cognition and working memory (3, 4). Furthermore, cholinesterase inhibitors, which boost overall cholinergic tone, provide some efficacy in patients with AD; however, dose-limiting adverse effects typically occur with disease progression. Therefore, selectively enhancing M<sub>1</sub> signaling may provide a potential therapeutic approach for the treatment of the cognitive deficits associated with AD and schizophrenia.

Several orthosteric mAChR agonists, including the nonselective mAChR partial agonist xanomeline (5), have entered clinical trials as potential cognition-enhancing agents. Unfortunately, xanomeline failed to meet significant cognition enhancement end points, a result attributed to dose-limiting nonselective cholinergic agonist adverse effects hypothesized to be mediated by the activation of peripheral M<sub>2</sub> and M<sub>3</sub> receptors (6–9). To increase selectivity for M<sub>1</sub> and therefore minimize nonselective adverse effects, multiple research efforts shifted to developing compounds that act via allosteric sites on mAChRs, which are structurally distinct from the orthosteric binding site and may be less highly conserved among receptor subtypes. To date, we and others have identified highly subtype-selective positive allosteric modulators (PAMs) of the M<sub>1</sub> receptor that avoid activation of other mAChR subtypes (see reviews (10–12)). Importantly, M<sub>1</sub> PAMs have shown robust efficacy in enhancing cognition and rescuing cognitive deficits in preclinical animal models relevant for AD and schizophrenia (13–18).

While these preclinical findings are extremely promising for the potential of M<sub>1</sub> PAMs to reverse cognitive deficits in patients, M<sub>1</sub> PAMs can display a diverse range of pharmacological properties, some of which are potentially detrimental to in vivo efficacy. Previously, we found that the presence of allosteric agonist activity in M<sub>1</sub> PAMs can limit in vivo efficacy and increase adverse effect liability (13, 14, 19, 20). Thus, minimalizing agonist activity can maximize the therapeutic window of M<sub>1</sub> PAMs (13, 19–21). These previous studies demonstrate that a complete understanding of the different pharmacological properties of structurally distinct M<sub>1</sub> PAMs is essential to fully evaluate clinical candidates and maximize their therapeutic potential.

In addition to displaying differences in allosteric agonist versus pure PAM activity, M<sub>1</sub> PAMs can also differ in their ability to confer bias to M<sub>1</sub> signaling. Signal bias is the phenomenon in which different GPCR ligands induce unique active receptor-complex states that are biased toward specific signaling pathways (22). For instance, characterization of a broad range of structurally diverse M<sub>1</sub> PAMs revealed that some M<sub>1</sub> PAMs potentiate M<sub>1</sub> signaling through the canonical phospholipase C (PLC) pathway but do not potentiate M<sub>1</sub>-mediated activation of another phospholipase, phospholipase D (PLD) (23). PLD is a widely expressed enzyme that hydrolyzes the major membrane phospholipid phosphatidylcholine into the signaling molecules phosphatidic acid (PA) and choline (24). PLD can be activated by a variety of receptors, including the M<sub>1</sub> receptor (25, 26). While there are six distinct mammalian isoforms of PLD, only PLD<sub>1</sub> and PLD<sub>2</sub> have well established enzymatic activity within the CNS (24, 27). However, little is known about the roles of PLD in regulating brain function, and the potential roles of PLD in M<sub>1</sub>-dependent signaling has not been explored. Thus, it is unclear whether M<sub>1</sub> PAMs that do not activate coupling of M<sub>1</sub> to PLD in cell lines will display functional differences in regulating M<sub>1</sub> signaling in the CNS relative to non-biased M<sub>1</sub> PAMs. For other GPCRs, signal bias provides the exciting potential advantage of selectively activating or potentiating therapeutically relevant pathways while minimizing activation of pathways responsible for adverse effects (11, 28, 29). Therefore, a better

understanding of these signaling mechanisms is essential for the development of M<sub>1</sub> PAMs as potential therapeutics for the treatment of prevalent cognitive disorders.

We now report that PLD activity is necessary for a form of M<sub>1</sub>-dependent long-term depression (LTD) in the prefrontal cortex (PFC) that has previously been implicated in the potential therapeutic response to M<sub>1</sub> PAMs (14, 30, 31). Furthermore, biased M<sub>1</sub> PAMs that do not potentiate M<sub>1</sub> coupling to PLD fail to potentiate this form of LTD, but actively inhibit M<sub>1</sub>-dependent LTD at this synapse. In contrast, biased and non-biased M<sub>1</sub> PAMs function similarly in their ability to potentiate M<sub>1</sub>-dependent responses in the CNS that we found to be PLD-independent. Together, these studies reveal that PLD is a critical downstream signaling node for this M<sub>1</sub>-dependent LTD in the PFC and demonstrate that biased M<sub>1</sub> PAMs can have fundamentally different effects, relative to those of non-biased M<sub>1</sub> PAMs, in regulating specific aspects of CNS function.

## **Results**

### **M<sub>1</sub> activation leads to phospholipase D activity in hM<sub>1</sub>-CHO cells**

M<sub>1</sub> activation has previously been shown to lead to an increase in PLD activity (25, 26), but it is not known whether this reflects activation of PLD<sub>1</sub>, PLD<sub>2</sub>, or both isoforms. Therefore, we set out to characterize the relative contribution of the two distinct PLD isoforms on selective activation of M<sub>1</sub> in Chinese Hamster Ovary (CHO) cells stably expressing the M<sub>1</sub> receptor. While direct measurement of the PLD product PA is challenging due to its rapid conversion into other lipids such as diacylglycerol and lysophosphatidic acid, in the presence of a primary alcohol such as 1-butanol, PLD generates the stable product phosphatidylbutanol (pButanol). pButanol cannot be metabolized, therefore allowing for quantification of intracellular PLD activity (24, 32, 33). In agreement with previous findings (23), the cholinergic orthosteric agonist carbachol (CCh) induces a robust increase in pButanol accumulation that is blocked by the selective M<sub>1</sub> antagonist VU0255035 (34) (Fig. 1A). Furthermore, the PLD<sub>1,2</sub> inhibitor ML299 (35) potently blocks M<sub>1</sub>-

mediated pButanol production, thereby validating that PLD is responsible for the generation of pButanol. Using the recently developed PLD<sub>1</sub> (VU0359595) (36) and PLD<sub>2</sub> (VU0364739) (37) isoform-selective inhibitors, we report that pharmacological inhibition of PLD<sub>1</sub>, but not PLD<sub>2</sub>, blocks M<sub>1</sub>-dependent activation of PLD in this in vitro assay (Fig. 1A). These data reveal that in this cell-based assay, M<sub>1</sub>-dependent activation of PLD primarily occurs through PLD<sub>1</sub>, not PLD<sub>2</sub>.

While we have previously characterized M<sub>1</sub> PAMs that couple to PLC but not PLD (23), these early biased M<sub>1</sub> PAMs suffer from low potency and aqueous solubility. Therefore, we set out to develop additional M<sub>1</sub> PAMs that potentiate M<sub>1</sub> coupling to PLC, but do not potentiate coupling to PLD. Previously, we have reported the M<sub>1</sub> PAMs VU0453595 (half-maximal effective concentration (EC<sub>50</sub>) 2140 ± 440 nM), VU0405652 (EC<sub>50</sub> 2580 ± 440 nM) and VU0405645 (EC<sub>50</sub> 340 ± 30 nM) are potent M<sub>1</sub> PAMs with respect to their ability to potentiate calcium mobilization in CHO cells stably expressing the M<sub>1</sub> receptor (Fig. 1B,C) (30, 38). We now report, unlike the prototypical M<sub>1</sub> PAM VU0453595, that both VU0405652 and VU0405645 fail to potentiate CCh activation of PLD in this in vitro assay (Fig. 1D). These findings demonstrate that VU0405652 and VU0405645 but not VU0453595 are biased M<sub>1</sub> PAMs in that they do not potentiate M<sub>1</sub> coupling to PLD.

### **PLD<sub>1</sub> but not PLD<sub>2</sub> is required for M<sub>1</sub>-mediated LTD in the mPFC**

From the cell-based assay we know that M<sub>1</sub> activation can increase PLD activity; however, little is known about whether PLD is necessary for M<sub>1</sub>-dependent responses in native neuronal tissue. Therefore, we set out to characterize the role of PLD in mediating established responses to M<sub>1</sub> activation in CNS preparations. One response to M<sub>1</sub> activation that may be relevant to some aspects of cognitive function is induction of long-term depression (LTD) of excitatory synaptic transmission in the medial prefrontal cortex (mPFC) (13, 14, 19, 30, 31, 39). We assessed the role of PLD in inducing LTD in the mPFC by measuring changes in layer V field excitatory postsynaptic potentials (fEPSP) evoked by electrical stimulation of afferents in layer II/III of the

mPFC (Fig. 2A). Consistent with previous findings (13, 14, 30, 39), a maximal concentration of CCh induces robust LTD of fEPSP slope at this synapse (Fig. 2B). Interestingly, bath application of the PLD<sub>1,2</sub> inhibitor ML299 before and during CCh application led to a complete loss of CCh-induced LTD (Fig. 2C, F). Using selective inhibitors for each PLD isoform, we found that pharmacological inhibition of PLD<sub>1</sub> with VU0359595 fully blocked CCh-induced LTD (Fig 2D, F). Congruent with the cell-based assay findings, inhibition of PLD<sub>2</sub> with VU0364739 had no effect on CCh-induced LTD at this synapse (Fig. 2E, F).

To confirm these pharmacological results, we obtained PLD<sub>1</sub> knockout (KO) mice. In agreement with the pharmacological findings, CCh induces a robust LTD in the littermate controls but not the PLD<sub>1</sub> KO mice (Fig. 2G, H). Importantly, the ability of a selective agonist of group II metabotropic glutamate receptors (LY379268) to induce LTD was intact in the PLD<sub>1</sub> KO mice and not significantly different than littermate controls (Fig. I, J). This form of LTD has been previously characterized in detail and is mechanistically distinct from M<sub>1</sub>-dependent LTD in the mPFC (40–42). These data suggest that the loss of M<sub>1</sub>-mediated LTD is not due to a general deficit in LTD in this brain region. Taken together, these data demonstrate a critical role of PLD, specifically PLD<sub>1</sub>, in this form of cortical M<sub>1</sub>-LTD.

### **Biased M<sub>1</sub> PAMs fail to potentiate M<sub>1</sub>-LTD in the mPFC**

We next tested the hypothesis that biased and non-biased M<sub>1</sub> PAMs would display functional differences in their ability to potentiate this PLD-dependent CCh-induced LTD of layer V fEPSPs electrically evoked in layer II/III in the mPFC. As previously shown, a submaximal concentration of CCh (10 μM) does not induce LTD at this synapse (Fig. 3A) (13, 19, 30). Similar to previous findings, bath application of the non-biased M<sub>1</sub> PAM VU0453595 for 10 min before and during CCh application leads to a robust LTD (Fig. 3B). Consistent with a role of PLD in inducing M<sub>1</sub>-LTD, neither of the biased M<sub>1</sub> PAMs, VU0405652 (Fig. 3C) nor VU0405645 (Fig. 3D), potentiate the LTD response to a submaximal concentration of CCh. Quantification of fEPSP

slope following drug washout indicates a significant depression of fEPSP slope compared to baseline with the M<sub>1</sub> PAM VU0453595 but not VU0405652 nor VU0405645 (Fig. 3E).

Theoretically, M<sub>1</sub> PAMs that confer this form of biased M<sub>1</sub> signaling stabilize a conformation of M<sub>1</sub> that favors activation of signaling by PLC and not PLD (43–46). Based on this, if these PAMs confer true bias to M<sub>1</sub> signaling, they should inhibit PLD-mediated responses. Thus, we tested the hypothesis that PAMs that bias M<sub>1</sub> signaling away from PLD would therefore block the LTD normally induced by a maximal concentration of CCh (Fig. 3F). In agreement with our hypothesis, VU0405645 blocked CCh-induced LTD (Fig. 3F, G). Collectively, these findings demonstrate a novel role of PLD in this cortical M<sub>1</sub>-LTD and that biased M<sub>1</sub> PAMs not only fail to potentiate a submaximal concentration of CCh-LTD, but can also actively block a maximal concentration of CCh-LTD.

### **PLD is not necessary for the M<sub>1</sub>-dependent increase of layer V sEPSC in the mPFC**

In light of these findings, we next set out to determine whether PLD is important in other M<sub>1</sub>-dependent functions in the CNS. Previously, we reported that M<sub>1</sub> activation increases the frequency of spontaneous excitatory postsynaptic currents (sEPSC) in mPFC layer V pyramidal neurons (15, 19, 30). In agreement with these previous findings, bath application of a maximal concentration of CCh induces a robust increase in sEPSC frequency in layer V pyramidal neurons (Fig. 4A). In contrast to M<sub>1</sub>-dependent LTD, the effect of CCh on sEPSCs was unchanged by pretreatment and co-application of the dual PLD inhibitor ML299 (Fig. 4B). Quantification of the peak CCh effect on sEPSC frequency indicates no statistically significant difference between CCh alone and CCh in the presence of ML299 (Fig. 4C). These data suggest that PLD is not necessary for this M<sub>1</sub>-dependent increase of sEPSC frequency in mPFC layer V pyramidal neurons.

Next, we sought to compare the two biased M<sub>1</sub> PAMs, VU0405652 and VU0405645, to our prototypical M<sub>1</sub> PAM, VU0453595, in their ability to potentiate a submaximal concentration of CCh-induced increases in mPFC layer V pyramidal neuron sEPSC frequency. As expected, bath



application of a submaximal concentration of CCh did not induce a significant change in sEPSC frequency (Fig. 4D). Similar to the M<sub>1</sub> PAM BQCA (15), the non-biased M<sub>1</sub> PAM VU0453595 induces a robust potentiation of the effect of a submaximal concentration of CCh on sEPSC frequency (Fig. 4E). Consistent with the studies with PLD inhibitors, both VU0405652 (Fig. 4F) and VU0405645 (Fig. 4G) potentiate agonist-induced increases in sEPSC frequency. Quantification of the peak effect on sEPSC frequency indicates a statistically significant difference between CCh alone and all three M<sub>1</sub> PAMs (Fig. 4H). Therefore, both biased and non-biased M<sub>1</sub> PAMs function similarly in their ability to potentiate a submaximal concentration of agonist-induced increases in mPFC layer V pyramidal neuron sEPSC frequency (Fig. 4I).

#### **PLD is not necessary for M<sub>1</sub> effects on excitability of striatal SPNs.**

The M<sub>1</sub> receptor is also highly expressed in the striatum (47), and we have shown that M<sub>1</sub> activation in spiny projection neurons (SPN) in the dorsal lateral striatum leads to a robust increase in SPN excitability that can be blocked by a selective M<sub>1</sub> antagonist (48, 49). Therefore, we set out to determine whether PLD is required for this M<sub>1</sub>-dependent response. As expected, bath application of CCh induces a robust increase in dorsal lateral striatum SPN excitability (Fig. 5A). In the presence of the dual PLD inhibitor ML299, CCh is still able to induce a marked increase in SPN excitability compared to baseline (Fig. 5B). Quantification of the CCh-induced increase in SPN excitability showed no significant difference between the change in number of spikes per pulse between control (DMSO) and ML299 groups (Fig. 5C). Therefore, similar to the sEPSC findings, PLD is not necessary for M<sub>1</sub>-dependent increases in dorsal lateral SPN excitability.

The finding that PLD is not involved in M<sub>1</sub> regulation of SPN excitability suggests that biased M<sub>1</sub> PAMs that selectively potentiate coupling to PLC and do not potentiate PLD activity would function similarly to non-biased M<sub>1</sub> PAMs in their ability to potentiate responses to a low concentration of CCh on SPN excitability. In agreement with our previous findings (49), a submaximal concentration of CCh induces a minimal increase in SPN excitability (Fig. 5D) that

can be robustly potentiated by the prototypical M<sub>1</sub> PAM VU0453595 (Fig. 5E). As expected, both VU0405652 (Fig. 5F) and VU0405645 (Fig. 5G) potentiate a submaximal concentration of CCh-induced increase of SPN excitability. The maximal increase in the number of spike discharges during agonist application was significantly higher in the presence of each of the three M<sub>1</sub> PAMs compared to the DMSO control condition (Fig. 5H-I). Taken together, these results demonstrate that biased and non-biased M<sub>1</sub> PAMs function similarly in their ability to potentiate M<sub>1</sub>-dependent CNS responses that are PLD-independent.

## **Discussion**

A large body of clinical and preclinical research suggests that enhancing mAChR signaling can be efficacious in the treatment of the cognitive symptoms associated with Alzheimer's disease and schizophrenia (7, 8, 50, 51). While multiple mAChR subtypes are involved in regulation of cognitive function, the majority of preclinical studies point to a dominant role of M<sub>1</sub> and suggest that selective modulation of the M<sub>1</sub> receptor may provide a therapeutic potential for the treatment of these devastating cognitive symptoms (14, 15, 17–19, 30, 52–58). However, M<sub>1</sub> regulates CNS function by actions on multiple signaling pathways and M<sub>1</sub> PAMs can display a strikingly diverse range of pharmacological properties, including signal bias. At present, little is known about the specific signaling pathways involved in the different physiological effects of M<sub>1</sub> activation and how signal bias can affect PAM modulation of M<sub>1</sub> actions in identified brain circuits. The present studies provide a fundamental advance in our understanding of at least one novel mechanism by which M<sub>1</sub> activation leads to plasticity changes within a key cortical structure in the CNS. Specifically, we found that a previously described M<sub>1</sub>-dependent LTD in the cortex is dependent on activation of PLD. Furthermore, we identified novel M<sub>1</sub> PAMs that selectively enhance M<sub>1</sub> coupling to PLC but not PLD, and found that these biased M<sub>1</sub> PAMs fail to potentiate this form of M<sub>1</sub>-dependent LTD. Finally, these biased M<sub>1</sub> PAMs actively block the ability of mAChR agonists to induce this PLD-dependent LTD, consistent with the hypothesis that these PAMs stabilize a conformation of

M<sub>1</sub> that favors activation of PLC over PLD and thereby bias M<sub>1</sub> signaling in favor of PLC-mediated responses. Importantly, not all M<sub>1</sub>-dependent responses are PLD-dependent and biased M<sub>1</sub> PAMs function similarly to non-biased M<sub>1</sub> PAMs in M<sub>1</sub> signaling that is PLD-independent.

While the ability of M<sub>1</sub> and other GPCRs to activate PLD is well established (59), little is known about the physiological roles of PLD in regulating CNS function. This has largely been due to the lack of selective inhibitors and other tools that allow systematic studies of PLD-mediated responses. However, the recent discovery of the highly selective PLD inhibitors used here (35–37), along with generation of PLD KO mice and biased M<sub>1</sub> PAMs reported in the present studies, provided an unprecedented opportunity to determine the roles of PLD in mediating specific responses to M<sub>1</sub> activation. With the availability of these new tools, these studies provide the first clear example of a specific physiological role of PLD in mediating a response to GPCR activation in the CNS and reveal a novel role for PLD in the induction of major form of synaptic plasticity in an identified brain circuit. Furthermore, these novel PLD inhibitors include selective inhibitors of PLD<sub>1</sub> and PLD<sub>2</sub>, the major isoforms of PLD expressed in the CNS. These isoform-selective inhibitors, along with PLD<sub>1</sub> KO mice, reveal a critical role of PLD<sub>1</sub> as the PLD isoform involved in mediating this response to M<sub>1</sub> activation.

M<sub>1</sub>-dependent LTD in the mPFC has been extensively studied and has been postulated to play a critical role in regulating specific inputs to the mPFC from the hippocampus and other extrinsic afferents (60). Cholinergic regulation of these inputs is thought to be important for the regulation of multiple aspects of mPFC function and previous studies suggest that M<sub>1</sub> expression and signaling in the mPFC can be impaired in some pathological states that could be relevant for schizophrenia and Alzheimer's disease (3, 14, 30, 61–67). However, very few studies have focused on understanding the cellular mechanisms underlying M<sub>1</sub>-dependent LTD in the PFC. While the current studies identify PLD<sub>1</sub> being critically important in M<sub>1</sub>-dependent cortical synaptic plasticity, the detailed molecular mechanism by which M<sub>1</sub> signals through PLD to induce synaptic plasticity changes in the cortex remains unknown. Rigorous molecular and biochemical studies

to elucidate this signaling pathway are necessary to fully understand the signaling cascade responsible for M<sub>1</sub>-dependent LTD.

The finding that PLD<sub>1</sub> is important for this form of synaptic plasticity, coupled with the finding that biased and non-biased M<sub>1</sub> PAMs have functionally distinct effects on this response, raises the possibility that different PAMs could have unique profiles in regulating cognitive function or other in vivo responses. It is possible that biased versus non-biased M<sub>1</sub> PAMs could induce dramatically different effects on specific behavioral responses, as is the case for biased and non-biased PAMs of the mGlu<sub>5</sub> subtype of metabotropic glutamate (mGlu) receptor (68, 69). Unfortunately, the currently available biased M<sub>1</sub> PAMs used in the present studies do not have appropriate properties to allow their use in in vivo behavioral studies. However, in future studies it may be possible to optimize biased M<sub>1</sub> PAMs that can be used to systematically evaluate the roles of PLD in specific behavioral responses that are dependent on M<sub>1</sub> activation. Extensive medicinal chemistry efforts are needed to develop biased M<sub>1</sub> PAMs that have favorable physical and pharmacokinetic properties suitable for systemic administration with high CNS penetrance in order to test whether systemically administered biased M<sub>1</sub> PAMs display functional differences in their ability to reverse cognitive deficits in preclinical animals relevant for AD and schizophrenia.

Finally, in future studies, it will also be important to develop an understanding of the precise molecular mechanisms involved in conferring bias for some M<sub>1</sub> PAMs. While there are multiple examples of allosteric modulators of GPCRs inducing biased signaling, little is known about the structural basis of biased versus non-biased signaling. Previous studies reveal multiple allosteric binding sites for some GPCRs, which could contribute to different responses to distinct classes of allosteric modulators (70–72). However, recent studies suggest that differences in M<sub>1</sub> PAM functionality may not be due to binding to different allosteric binding pockets, but that binding of PAMs to a single allosteric site may stabilize different receptor conformational states (73, 74). Understanding how allosteric modulators of GPCRs induce their effects will help facilitate the rational design of the next generation of PAMs and NAMs.

## **Materials and Methods**

**Cell line and Calcium Mobilization Assay:** Briefly, M<sub>1</sub>-CHO cells were plated in black-walled, clear-bottomed 384 well plates (Greiner Bio-One, Monroe, NC) the day before assay. The next day, cells were washed with assay buffer (Hank's balanced salt solution, 20 mM HEPES, 4.16 mM sodium bicarbonate, and 2.5 mM probenecid) and immediately incubated with 20 µL of 1.15 µM Fluo-4-acetomethoxyester (Fluo-4 AM) dye solution prepared in assay buffer for 45 min at 37 °C. M<sub>1</sub> PAMs were serially diluted (1:3) in DMSO for 10-point concentration-response curves (CRC), and further diluted in assay buffer at starting final concentration 30µM using Echo liquid handler (Labcyte, Sunnyvale CA). After removing dye, cells were washed with assay buffer and immediately calcium flux was measured using the Functional Drug Screening System (FDSS7000, Hamamatsu, Japan) The serially diluted compounds or DMSO vehicle were added to cells for 2.5 min and then an EC<sub>20</sub> concentration of acetylcholine (ACh) was added and incubated for 2 min. EC<sub>max</sub> concentration was also added to cells that were incubated with DMSO vehicle to ensure the EC<sub>20</sub> calcium response. To determine the potency and efficacy of the agonist and PAM, data were analyzed to generate a concentration-response curve using a four-point logistical equation in GraphPad Prism 5.0 (GraphPad Software, Inc., La Jolla, CA).

**PLD activity assay.** Methods were adapted from Walker SJ & Brown HA, 2004. Briefly, CHO cells stably transfected with the human M<sub>1</sub> muscarinic acetylcholine receptor were grown on growth media consisted of Ham's F-12 Nutrient Mix (ThermoFisher #11765), 10% FBS, 20 mM HEPES, 1X Antibiotic/Antimycotic, 500 µM G418. The cells were then plated on 6-well plates for a total of approximately 0.7x10<sup>6</sup> cells / 2mL / well. Plating media consisted of growth media without FBS or G418. The following day, plating media was aspirated off and labeling media was prepared by adding <sup>3</sup>H-palmitic acid (5 µCi/ µL) supplemented with 2.08 µg/µL Phosphoethanolamine (PE stock, 25 mg/mL in CHCl<sub>3</sub>) to serum free media supplemented with bovine serum albumin. Each

well contained 1 mL media with 10 to 30  $\mu\text{Ci}$  [ $^3\text{H}$ ]-palmitic acid. Labeling was allowed to occur in a 37 °C incubator overnight.

The next morning, the plating media was carefully aspirated off and the cells were treated for 5 min with DMSO or  $M_1$  PAM then 30 min in the presence of 0.3% 1-butanol in serum-free assay media (1 mL media/well) or no butanol serum-free assay media as a negative control and the plates were incubated at 37 °C.  $^3\text{H}$  labeling efficiency was measured by subtracting the post-labeling medium from the pre-labeling medium. All pharmacological agent stocks were used at 500 or 1000-fold higher than the final concentration. Immediately after the incubation, 600  $\mu\text{L}$  ice cold acidified methanol (1:1 ratio of 0.1 N HCl to Methanol) was added and the cells were scraped off using a cell scraper and transferred to a 1.5 mL Eppendorf tube. 300  $\mu\text{L}$  room-temperature  $\text{CHCl}_3$  was then added and the sample which was then vortexed vigorously for approximately 20 seconds. The samples were then spun at 16,000 g for 5 min to separate phases. The bottom lipid phase was removed carefully to ensure no other phases were carried over and transferred to a new 1.5 mL Eppendorf tube. The samples were then dried under  $\text{N}_2$  gas until all liquid was evaporated. The lipids were then resuspended in 25  $\mu\text{L}$   $\text{CHCl}_3$  and immediately spotted onto the TLC plate (Sorbtech, Norcross GA; Cat#2315126C). Non-radioactive lipid standards such as p-Butanol and phosphatidic acid were also spotted on the TLC plate. The TLC tank was prepared by placing chromatography paper 7-inch (H) x 22.5-inch (W) so that it covers approximately 75% of the tank's height. The mobile phase was then added (10  $\text{CHCl}_3$ : 2 Methanol: 2 Acetic Acid: 4 Acetone: 1  $\text{H}_2\text{O}$ ) and allowed to equilibrate for 1 hour before the TLC plate was added and run for 1.5 to 2 hours. The plate was then removed from the tank and allowed to completely dry before imaging using autoradiography film in conjunction with an intensifying screen (BioMax Transcreen LE, Carestream Health) and placed in a -80 °C freezer for 3-5 days. The film was then processed after exposure and quantified using Chemdoc (Biorad).

**Animals.** All animal studies were approved by the Vanderbilt University Medical Center Institutional Animal Care and Use Committee and were conducted in accordance with the National Institutes of Health Guide for the Care and Use of Laboratory Animals. 6-10 week old male and female C57BL6/J mice (Jackson laboratories) as well as both male and female PLD1 knockout (KO) mice (obtained from the trans-NIH Knock-Out Mouse Project Repository, [www.komp.org](http://www.komp.org)) maintained on a C57BL6/J background were used in electrophysiology studies. Mice were group housed 4–5 per cage, maintained on a 12 h light/dark cycle, and food and water were provided ad libitum.

**Whole cell electrophysiology.** Mice were anesthetized with isoflurane then transcardially perfused with ice-cold cutting solution (in mM: 230 sucrose, 2.5 KCl, 8 MgSO<sub>4</sub>, 0.5 CaCl<sub>2</sub>, 1.25 NaH<sub>2</sub>PO<sub>4</sub>, 10 D-glucose, 26 NaHCO<sub>3</sub>), and the brains were removed then submerged in ice-cold cutting solution. Coronal slices containing either dorsal striatum or prelimbic prefrontal cortex (PFC) were cut at 250 μm or 300 μm, respectively, and were transferred to a holding chamber containing NMDG-HEPES recovery solution (in mM: 93 NMDG, 2.5 KCl, 1.2 NaH<sub>2</sub>PO<sub>4</sub>, 30 NaHCO<sub>3</sub>, 20 HEPES, 25 D-glucose, 5 sodium ascorbate, 2 thiourea, 3 sodium pyruvate, 10 MgSO<sub>4</sub>, 0.5 CaCl<sub>2</sub>, 12 N-acetyl-L-cysteine, pH 7.35, <310 mOsm) for 8-10 minutes at 32 °C. Slices were then transferred to a room temperature holding chamber for 1.0 hour containing ACSF (in mM: 126 NaCl, 1.25 NaH<sub>2</sub>PO<sub>4</sub>, 2.5 KCl, 10 D-glucose, 26 NaHCO<sub>3</sub>, 2 CaCl<sub>2</sub>, 1 MgSO<sub>4</sub>) supplemented with 600-μM sodium ascorbate for slice viability. All buffers were continuously bubbled with 95% O<sub>2</sub>/5% CO<sub>2</sub>. Subsequently, slices were transferred to a 30-31 °C submersion recording chamber (Warner Instruments) where they were perfused with ACSF at a rate of 2 mL/min. Recording pipettes were constructed from thin-walled borosilicate capillary glass tubing (I.D.=1.17 mm, O.D. 1.50 mm; Warner Instruments, Hamden, CT), pulled with a horizontal pipette puller (P-97 Sutter Instrument Co., Novato, CA) to a resistance of 4-6 MΩ when filled with

potassium-based internal solution: (mM) 125 K-gluconate, 4 NaCl, 10 HEPES, 4 MgATP, 0.3 NaGTP, 10 Tris-phosphocreatine.

For the PFC recordings, pyramidal neurons were visualized based on morphology with a 40X water-immersion lens with oblique illumination coupled with an Olympus BX50WI upright microscope (Olympus). After a stable gigaohm seal was formed, light suction was applied to break through the cell membrane and achieve whole-cell access. The access resistance was checked at the beginning and the end of each experiment and neurons with an access resistance of neurons greater than 30 mOhm were not used for analysis. Pyramidal neurons were further identified by their regular spiking pattern following depolarizing current injections induced by a series of 500 ms current steps (-150 pA to +100 pA) incremented in +25 pA performed in current clamp mode. Spontaneous EPSCs were recorded at a holding potential of -70 mV (the reversal potential for GABA<sub>A</sub> channels) and the junction potential was not compensated. The voltage clamp signal was low pass filtered at 5 kHz and digitized at 10 kHz using a Digidata 1322A and acquired using Axon MultiClamp 700B (Molecular Devices, Sunnyvale, CA) and controlled by pClamp 9.2 and Clampex 10.6.2 running on a Dell PC. After a stable baseline was recorded for 5-10 min, test compounds were diluted to the appropriate concentrations in DMSO (<0.1% final) in ACSF and applied to the bath using a peristaltic pump perfusion system. Cumulative probability plots of inter-event-intervals (IEI) were constructed using 2 min episodes of baseline and peak effect during drug application. All sEPSC analyses were performed using MiniAnalysis (Synaptosoft Inc., Decatur, GA) or Clampfit 10.2 (Molecular Devices).

For striatal spiny projection neurons (SPN) recordings the change in excitability of MSN was assessed in current clamp mode by monitoring the change in the number of spike discharges in response to a near rheobase depolarization current step (1.5 s). The access resistance was checked at the beginning and the end of each experiment, which were compensated using “bridge balance”. The change in spike number was calculated by averaging the number of spikes during



the baseline subtracted from the peak drug-effect (60 seconds). Offline data analysis to calculate change in SPN excitability was performed using Clampfit 10.2 (Molecular Devices).

**Extracellular field electrophysiology.** 400  $\mu\text{m}$  coronal slices containing prelimbic prefrontal cortex were obtained as described above. Recording pipettes were constructed from thin-walled borosilicate capillary glass tubing (I.D.=1.17 mm, O.D. 1.50 mm; Warner Instruments, Hamden, CT), pulled with a horizontal pipette puller (P-97 Sutter Instrument Co., Novato, CA) to a resistance of 1-3M $\Omega$  when filled with ACSF. Field excitatory postsynaptic potentials (fEPSPs) were recorded from layer V of the prelimbic cortex and evoked electrically by a concentric bipolar stimulating electrode (200  $\mu\text{s}$  duration, 0.05 Hz; inter-pulse interval of 50 ms) in the superficial layers II-III. Layer II/III was visualized using a Olympus BX50WI upright microscope (Olympus, Lake Success, NY) microscope according to landmarks illustrated in the Allen mouse brain atlas (75) and the recording electrode was placed laterally approximately 200  $\mu\text{m}$  away from layer 2/3 into layer V so that the recording and stimulating electrodes were parallel to each other. Input-output curves were generated to determine the stimulus intensity that produced approximately 70% of the maximum fEPSP slope before each experiment, which was then used as the baseline stimulation. Data were digitized using a Multiclamp 700B, using a sampling rate of 20,000kHz and were filtered at 0.5kHz, with a Digidata 1322A, pClamp 9.2 and Clampex 10.6.2 software (Molecular Devices) running on a Dell PC (Round Rock, TX). All test compounds, with the exception of CCh (Tocris Bioscience, Bristol, UK) which was diluted in H<sub>2</sub>O, were diluted to the appropriate concentrations in DMSO (<0.1% final) in ACSF and applied to the bath using a peristaltic pump perfusion system. Offline data analysis to calculate fEPSP slope was performed using Clampfit 10.2 (Molecular Devices).

**Statistics.** Two-tailed Student's t-test and one-way ANOVA with Bonferonni post-tests were used as appropriate. Changes in fEPSP slope before and during drug add (peak effect) was compared using a paired t-test. For all statistical comparisons, the critical p-value was considered to be 0.05.

The numbers of animals to be used for each experiment outlined within the study were determined using a power calculation statistical analysis using the Power and Sample Size Calculation software program available at Vanderbilt University (Dupont and Plummer, PS Controlled Clinical Trials. 18:274 1997). Animal numbers are based on a power calculation using standard errors from published studies and previous experience to detect >20% difference for each outlined experiment with an 80% power ( $\alpha = 0.05$ , power = 80%,  $\delta = 0.2$ ,  $\sigma = 0.18$ ).

## References

1. C. L. Masters *et al.*, Alzheimer's disease. *Nat. Rev. Dis. Primers.* **1**, 15056 (2015).
2. J. A. Lieberman, M. B. First, Psychotic Disorders. *N. Engl. J. Med.* **379**, 270–280 (2018).
3. E. Scarr *et al.*, Low levels of muscarinic M1 receptor-positive neurons in cortical layers III and V in Brodmann areas 9 and 17 from individuals with schizophrenia. *J. Psychiatry Neurosci.* **43**, 338–346 (2018).
4. D. R. Euston, A. J. Gruber, B. L. McNaughton, The role of medial prefrontal cortex in memory and decision making. *Neuron.* **76**, 1057–1070 (2012).
5. J. N. Heinrich *et al.*, Pharmacological comparison of muscarinic ligands: historical versus more recent muscarinic M1-preferring receptor agonists. *Eur. J. Pharmacol.* **605**, 53–56 (2009).
6. A. M. Bender, C. K. Jones, C. W. Lindsley, Classics in chemical neuroscience: xanomeline. *ACS Chem. Neurosci.* **8**, 435–443 (2017).
7. N. C. Bodick *et al.*, Effects of xanomeline, a selective muscarinic receptor agonist, on cognitive function and behavioral symptoms in Alzheimer disease. *Arch. Neurol.* **54**, 465–473 (1997).
8. A. Shekhar *et al.*, Selective muscarinic receptor agonist xanomeline as a novel treatment approach for schizophrenia. *Am. J. Psychiatry.* **165**, 1033–1039 (2008).
9. F. P. Bymaster *et al.*, Role of specific muscarinic receptor subtypes in cholinergic parasympathomimetic responses, in vivo phosphoinositide hydrolysis, and pilocarpine-induced seizure activity. *Eur. J. Neurosci.* **17**, 1403–1410 (2003).
10. S. E. Yohn, P. J. Conn, Positive allosteric modulation of M1 and M4 muscarinic receptors as potential therapeutic treatments for schizophrenia. *Neuropharmacology.* **136**, 438–448 (2018).
11. D. J. Foster, J. P. Conn, Allosteric Modulation of GPCRs: New Insights and Potential Utility for Treatment of Schizophrenia and Other CNS Disorders. *Neuron* (2017).

12. A. Bock, R. Schrage, K. Mohr, Allosteric modulators targeting CNS muscarinic receptors. *Neuropharmacology* (2017), doi:10.1016/j.neuropharm.2017.09.024.
13. J. M. Rook *et al.*, A Novel M1 PAM VU0486846 Exerts Efficacy in Cognition Models without Displaying Agonist Activity or Cholinergic Toxicity. *ACS Chem. Neurosci.* **9**, 2274–2285 (2018).
14. M. D. Grannan *et al.*, Prefrontal Cortex-Mediated Impairments in a Genetic Model of NMDA Receptor Hypofunction Are Reversed by the Novel M1 PAM VU6004256. *ACS Chem. Neurosci.* **7**, 1706–1716 (2016).
15. J. K. Shirey *et al.*, A selective allosteric potentiator of the M1 muscarinic acetylcholine receptor increases activity of medial prefrontal cortical neurons and restores impairments in reversal learning. *J. Neurosci.* **29**, 14271–14286 (2009).
16. K. H. C. Choy *et al.*, Positive allosteric modulation of the muscarinic M1 receptor improves efficacy of antipsychotics in mouse glutamatergic deficit models of behavior. *J. Pharmacol. Exp. Ther.* **359**, 354–365 (2016).
17. J. M. Uslaner *et al.*, The muscarinic M1 receptor positive allosteric modulator PQCA improves cognitive measures in rat, cynomolgus macaque, and rhesus macaque. *Psychopharmacology.* **225**, 21–30 (2013).
18. H. S. Lange, C. E. Cannon, J. T. Drott, S. D. Kuduk, J. M. Uslaner, The M1 muscarinic positive allosteric modulator PQCA improves performance on translatable tests of memory and attention in rhesus monkeys. *J. Pharmacol. Exp. Ther.* **355**, 442–450 (2015).
19. S. P. Moran *et al.*, M1-positive allosteric modulators lacking agonist activity provide the optimal profile for enhancing cognition. *Neuropsychopharmacology.* **43**, 1763–1771 (2018).
20. S. P. Moran *et al.*, PF-06827443 Displays Robust Allosteric Agonist and Positive Allosteric Modulator Activity in High Receptor Reserve and Native Systems. *ACS Chem. Neurosci.* **9**, 2218–2224 (2018).
21. J. M. Rook *et al.*, Diverse Effects on M1 Signaling and Adverse Effect Liability within a Series of M1 Ago-PAMs. *ACS Chem. Neurosci.* **8**, 866–883 (2017).
22. T. Kenakin, A. Christopoulos, Signalling bias in new drug discovery: detection, quantification and therapeutic impact. *Nat. Rev. Drug Discov.* **12**, 205–216 (2013).
23. J. E. Marlo *et al.*, Discovery and characterization of novel allosteric potentiators of M1 muscarinic receptors reveals multiple modes of activity. *Mol. Pharmacol.* **75**, 577–588 (2009).
24. H. A. Brown, L. G. Henage, A. M. Preininger, Y. Xiang, J. H. Exton, *Biochemical analysis of phospholipase D.* (2007), vol. 434.
25. S. Pepitoni *et al.*, Phospholipase D activity and phosphatidylethanol formation in stimulated HeLa cells expressing the human m1 muscarinic acetylcholine receptor gene. *Biochem. Biophys. Res. Commun.* **176**, 453–458 (1991).

26. F. R. McKenzie, K. Seuwen, J. Pouysségur, Stimulation of phosphatidylcholine breakdown by thrombin and carbachol but not by tyrosine kinase receptor ligands in cells transfected with M1 muscarinic receptors. Rapid desensitization of phosphocholine-specific (PC) phospholipase D but sustained activity of PC-phospholipase C. *J. Biol. Chem.* **267**, 22759–22769 (1992).
27. R. K. Nelson, M. A. Frohman, Physiological and pathophysiological roles for phospholipase D. *J. Lipid Res.* **56**, 2229–2237 (2015).
28. C. L. Schmid *et al.*, Bias factor and therapeutic window correlate to predict safer opioid analgesics. *Cell.* **171**, 1165–1175.e13 (2017).
29. T. Kenakin, Is the quest for signaling bias worth the effort? *Mol. Pharmacol.* **93**, 266–269 (2018).
30. A. Ghoshal *et al.*, Potentiation of M1 muscarinic receptor reverses plasticity deficits and negative and cognitive symptoms in a schizophrenia mouse model. *Neuropsychopharmacology.* **41**, 598–610 (2016).
31. A. Ghoshal *et al.*, Role of mGlu5 receptors and inhibitory neurotransmission in M1 dependent muscarinic LTD in the prefrontal cortex: implications in schizophrenia. *ACS Chem. Neurosci.* **8**, 2254–2265 (2017).
32. J. H. Exton, Regulation of phospholipase D. *FEBS Lett.* **531**, 58–61 (2002).
33. S. B. Bocckino, P. B. Wilson, J. H. Exton, Ca<sup>2+</sup> -mobilizing hormones elicit phosphatidylethanol accumulation via phospholipase D activation. *FEBS Lett.* **225**, 201–204 (1987).
34. D. J. Sheffler *et al.*, A novel selective muscarinic acetylcholine receptor subtype 1 antagonist reduces seizures without impairing hippocampus-dependent learning. *Mol. Pharmacol.* **76**, 356–368 (2009).
35. S. A. Scott *et al.*, in *Probe Reports from the NIH Molecular Libraries Program* (National Center for Biotechnology Information (US), Bethesda (MD), 2010).
36. J. A. Lewis *et al.*, Design and synthesis of isoform-selective phospholipase D (PLD) inhibitors. Part I: Impact of alternative halogenated privileged structures for PLD1 specificity. *Bioorg. Med. Chem. Lett.* **19**, 1916–1920 (2009).
37. R. Lavieri *et al.*, Design and synthesis of isoform-selective phospholipase D (PLD) inhibitors. Part II. Identification of the 1,3,8-triazaspiro[4,5]decan-4-one privileged structure that engenders PLD2 selectivity. *Bioorg. Med. Chem. Lett.* **19**, 2240–2243 (2009).
38. P. R. Reid *et al.*, Discovery and optimization of a novel, selective and brain penetrant M1 positive allosteric modulator (PAM): the development of ML169, an MLPCN probe. *Bioorg. Med. Chem. Lett.* **21**, 2697–2701 (2011).
39. H. G. S. Martin *et al.*, Endocannabinoids Mediate Muscarinic Acetylcholine Receptor-Dependent Long-Term Depression in the Adult Medial Prefrontal Cortex. *Front. Cell Neurosci.* **9**, 457 (2015).

40. A. G. Walker *et al.*, Metabotropic glutamate receptor 3 activation is required for long-term depression in medial prefrontal cortex and fear extinction. *Proc. Natl. Acad. Sci. USA*. **112**, 1196–1201 (2015).
41. M. E. Joffe, C. I. Santiago, J. L. Engers, C. W. Lindsley, P. J. Conn, Metabotropic glutamate receptor subtype 3 gates acute stress-induced dysregulation of amygdalo-cortical function. *Mol. Psychiatry* (2017), doi:10.1038/s41380-017-0015-z.
42. M. E. Joffe *et al.*, Mechanisms underlying prelimbic prefrontal cortex mGlu3/mGlu5-dependent plasticity and reversal learning deficits following acute stress. *Neuropharmacology*. **144**, 19–28 (2018).
43. J. R. Lane, L. T. May, R. G. Parton, P. M. Sexton, A. Christopoulos, A kinetic view of GPCR allostery and biased agonism. *Nat. Chem. Biol.* **13**, 929–937 (2017).
44. D. Wootten, A. Christopoulos, M. Marti-Solano, M. M. Babu, P. M. Sexton, Mechanisms of signalling and biased agonism in G protein-coupled receptors. *Nat. Rev. Mol. Cell Biol.* **19**, 638–653 (2018).
45. P. J. Conn, A. Christopoulos, C. W. Lindsley, Allosteric modulators of GPCRs: a novel approach for the treatment of CNS disorders. *Nat. Rev. Drug Discov.* **8**, 41–54 (2009).
46. T. P. Kenakin, Biased signalling and allosteric machines: new vistas and challenges for drug discovery. *Br. J. Pharmacol.* **165**, 1659–1669 (2012).
47. J. E. Davoren *et al.*, Design and Synthesis of  $\gamma$ - and  $\delta$ -Lactam M1 Positive Allosteric Modulators (PAMs): Convulsion and Cholinergic Toxicity of an M1-Selective PAM with Weak Agonist Activity. *J. Med. Chem.* **60**, 6649–6663 (2017).
48. X. Lv *et al.*, M1 muscarinic activation induces long-lasting increase in intrinsic excitability of striatal projection neurons. *Neuropharmacology*. **118**, 209–222 (2017).
49. Z. Xiang, A. D. Thompson, C. K. Jones, C. W. Lindsley, P. J. Conn, Roles of the M1 muscarinic acetylcholine receptor subtype in the regulation of basal ganglia function and implications for the treatment of Parkinson's disease. *J. Pharmacol. Exp. Ther.* **340**, 595–603 (2012).
50. F. P. Bymaster *et al.*, Xanomeline: A selective muscarinic agonist for the treatment of Alzheimer's disease. *Drug Dev Res.* **40**, 158–170 (1997).
51. H. Hall *et al.*, AF710B, an M1/sigma-1 receptor agonist with long-lasting disease-modifying properties in a transgenic rat model of Alzheimer's disease. *Alzheimers Dement.* **14**, 811–823 (2018).
52. L. Ma *et al.*, Selective activation of the M1 muscarinic acetylcholine receptor achieved by allosteric potentiation. *Proc. Natl. Acad. Sci. USA*. **106**, 15950–15955 (2009).
53. R. W. Gould *et al.*, Role for the M1 Muscarinic Acetylcholine Receptor in Top-Down Cognitive Processing Using a Touchscreen Visual Discrimination Task in Mice. *ACS Chem. Neurosci.* **6**, 1683–1695 (2015).

54. J. D. Vardigan *et al.*, Improved cognition without adverse effects: novel M1 muscarinic potentiator compares favorably to donepezil and xanomeline in rhesus monkey. *Psychopharmacology*. **232**, 1859–1866 (2015).
55. J. E. Davoren *et al.*, Design and optimization of selective azaindole amide M1 positive allosteric modulators. *Bioorg. Med. Chem. Lett.* **26**, 650–655 (2016).
56. G. J. Digby *et al.*, Novel allosteric agonists of M1 muscarinic acetylcholine receptors induce brain region-specific responses that correspond with behavioral effects in animal models. *J. Neurosci.* **32**, 8532–8544 (2012).
57. E. P. Lebois *et al.*, Disease-Modifying Effects of M1 Muscarinic Acetylcholine Receptor Activation in an Alzheimer’s Disease Mouse Model. *ACS Chem. Neurosci.* **8**, 1177–1187 (2017).
58. E. Kurimoto *et al.*, An Approach to Discovering Novel Muscarinic M1 Receptor Positive Allosteric Modulators with Potent Cognitive Improvement and Minimized Gastrointestinal Dysfunction. *J. Pharmacol. Exp. Ther.* **364**, 28–37 (2018).
59. S. J. Walker, H. A. Brown, Molecular and Cellular Biology, Cornell University, Ithaca, NY, USA, Measurement of G protein-coupled receptor-stimulated phospholipase D activity in intact cells. *Methods Mol. Biol.* **237**, 89–97 (2004).
60. A. Ghoshal, P. J. Conn, The hippocampo-prefrontal pathway: a possible therapeutic target for negative and cognitive symptoms of schizophrenia. *Future Neurol.* **10**, 115–128 (2015).
61. E. Scarr, S. Sundram, D. Keriakous, B. Dean, Altered hippocampal muscarinic M4, but not M1, receptor expression from subjects with schizophrenia. *Biol. Psychiatry.* **61**, 1161–1170 (2007).
62. B. Dean, S. Hopper, P. J. Conn, E. Scarr, Changes in BQCA Allosteric Modulation of [(3)H]NMS Binding to Human Cortex within Schizophrenia and by Divalent Cations. *Neuropsychopharmacology.* **41**, 1620–1628 (2016).
63. B. Dean, M. McLeod, D. Keriakous, J. McKenzie, E. Scarr, Decreased muscarinic1 receptors in the dorsolateral prefrontal cortex of subjects with schizophrenia. *Mol. Psychiatry.* **7**, 1083–1091 (2002).
64. E. Scarr, M. Udawela, E. A. Thomas, B. Dean, Changed gene expression in subjects with schizophrenia and low cortical muscarinic M1 receptors predicts disrupted upstream pathways interacting with that receptor. *Mol. Psychiatry.* **23**, 295–303 (2016).
65. E. Scarr *et al.*, Decreased cortical muscarinic receptors define a subgroup of subjects with schizophrenia. *Mol. Psychiatry.* **14**, 1017–1023 (2009).
66. A. Caccamo *et al.*, M1 receptors play a central role in modulating AD-like pathology in transgenic mice. *Neuron.* **49**, 671–682 (2006).
67. R. Medeiros *et al.*, Loss of muscarinic M1 receptor exacerbates Alzheimer’s disease-like pathology and cognitive decline. *Am. J. Pathol.* **179**, 980–991 (2011).

68. J. M. Rook *et al.*, Biased mGlu5-Positive Allosteric Modulators Provide In Vivo Efficacy without Potentiating mGlu5 Modulation of NMDAR Currents. *Neuron*. **86**, 1029–1040 (2015).
69. S. Parmentier-Batteur *et al.*, Mechanism based neurotoxicity of mGlu5 positive allosteric modulators--development challenges for a promising novel antipsychotic target. *Neuropharmacology*. **82**, 161–173 (2014).
70. D. E. O'Brien *et al.*, Differential Pharmacology and Binding of mGlu2 Receptor Allosteric Modulators. *Mol. Pharmacol.* **93**, 526–540 (2018).
71. A. S. Hammond *et al.*, Discovery of a Novel Chemical Class of mGlu(5) Allosteric Ligands with Distinct Modes of Pharmacology. *ACS Chem. Neurosci.* **1**, 702–716 (2010).
72. A. L. Rodriguez *et al.*, in *Probe Reports from the NIH Molecular Libraries Program* (National Center for Biotechnology Information (US), Bethesda (MD), 2010).
73. E. Khajehali *et al.*, Probing the binding site of novel selective positive allosteric modulators at the M1 muscarinic acetylcholine receptor. *Biochem. Pharmacol.* **154**, 243–254 (2018).
74. D. M. Thal *et al.*, Crystal structures of the M1 and M4 muscarinic acetylcholine receptors. *Nature*. **531**, 335–340 (2016).
75. E. S. Lein *et al.*, Genome-wide atlas of gene expression in the adult mouse brain. *Nature*. **445**, 168–176 (2007).

### **Acknowledgments**

We would like to thank the Dan Marino foundation for their generous support of the Clinical Neuroscience Scholars program at Vanderbilt University, to thank Weimin Peng for excellent assistance in maintaining colonies and genotyping of transgenic mice.

### **Funding Sources**

This work was supported by NIH F31 MH114368 (Moran), NIH T32 MH 64913-14 (Moran), U01 MH087965 (Conn), R01 MH062646 (Conn), R01 MH073676 (Conn) and R01 MH082867 (Lindsley).

### **Author Contributions**

SPM, ZX, CAD, CMD, CWL and PJC designed experiments; SPM, ZX, CAD, JM, XL, SF, and JMR performed experiments. SPM and PJC wrote the manuscript with input from all the authors.

**Conflict of Interest:** PJC, CWL, and CWN are inventors on patents that protect different classes of muscarinic acetylcholine receptor allosteric modulators.



## Figures

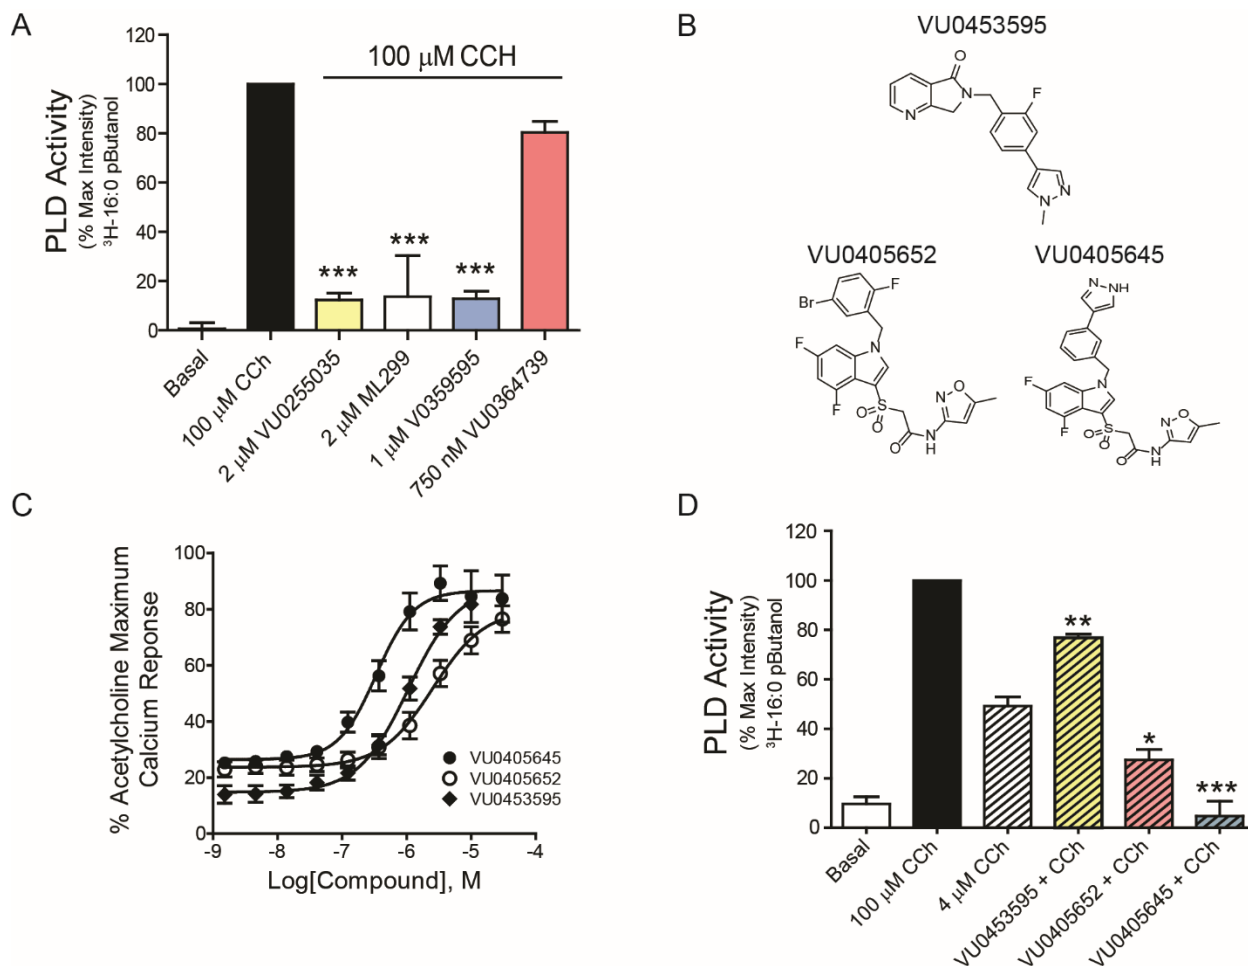

**Figure 1:** M<sub>1</sub> activation leads to phospholipase D (PLD) activity in hM<sub>1</sub>-CHO cells and M<sub>1</sub> PAMs show differential signal bias in potentiating M<sub>1</sub>-mediated PLD signaling. (A) In rM<sub>1</sub> CHO cells, PLD activity is measured by quantification of the PLD product phosphatidylbutanol (pButanol) normalized to 100  $\mu$ M CCh. PLD activity is blocked by 2  $\mu$ M VU0255035 (M<sub>1</sub> antagonist,  $p < 0.001$  relative to 100  $\mu$ M CCh), 2  $\mu$ M ML299 (PLD<sub>1,2</sub> inhibitor,  $p < 0.001$  relative to 100  $\mu$ M CCh), 1  $\mu$ M VU0359595 (PLD<sub>1</sub> inhibitor,  $p < 0.001$  relative to 100  $\mu$ M CCh), but not by 750 nM VU0364739 (PLD<sub>2</sub> inhibitor,  $p > 0.05$  relative to 100  $\mu$ M CCh) (one-way ANOVA  $F_{4,10} = 29.34$ ;  $p = 0.0001$ , with a post-hoc Dunnett's test using CCh alone as the control group, \*\*\*  $p < 0.001$ ). (B) Structures of the M<sub>1</sub> PAMs VU0453595 (left), VU0405652 (center), VU0405645 (right). (C) Concentration-response curves of rM<sub>1</sub>-CHO calcium mobilization assay for VU0453595,

VU0405652, VU0405645 in the presence of an EC<sub>20</sub> concentration of acetylcholine. (D) 4 μM CCh produces a submaximal increase in PLD activity that can be potentiated by 10 μM VU0453595 ( $p < 0.01$  relative to 4 μM CCh). 10 μM VU0405652 ( $p < 0.05$  relative to 4 μM CCh) and 10 μM VU0405645 ( $p < 0.001$  relative to 4 μM CCh) significantly reduced PLD activity compared to 4 μM CCh alone (one-way ANOVA  $F_{3,8} = 55.1$ ;  $p = 0.0001$ , \* $p < 0.05$ , \*\* $p < 0.01$ , \*\*\*  $p < 0.001$ ). Data from (A), (C) and (D) represent mean  $\pm$  SEM from three independent experiments performed in triplicate.

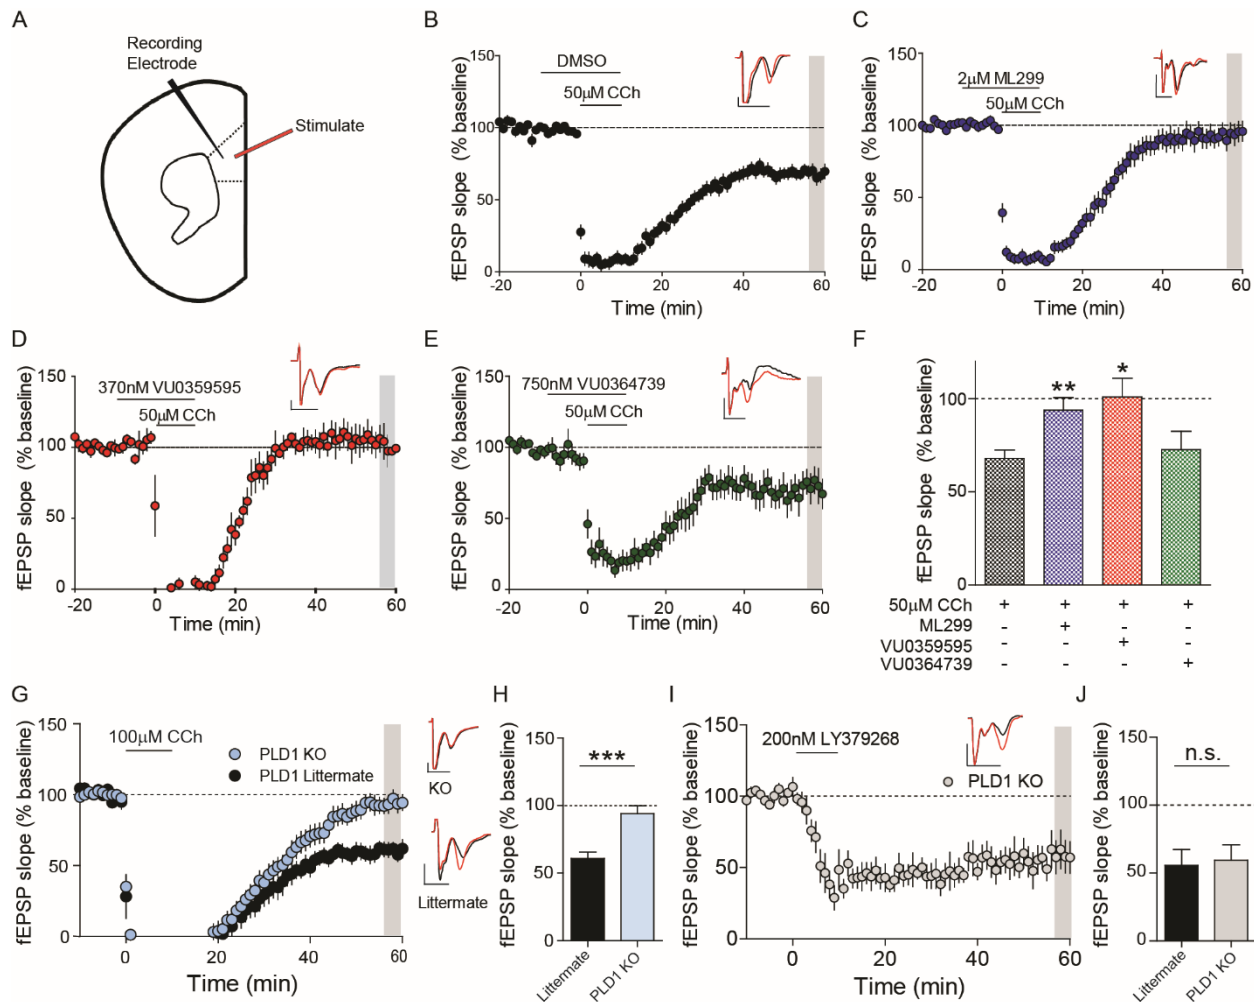

**Figure 2:** PLD<sub>1</sub> but not PLD<sub>2</sub> is necessary for CCh-LTD in the medial prefrontal cortex (mPFC).

(A) Schematic of the field excitatory post-synaptic potentials (fEPSP) recorded from layer V of the mouse mPFC in response to electrical stimulation in the superficial layers II–III. (B) Time course graph showing that bath application of 50  $\mu$ M carbachol (CCh) induces a long-term depression of fEPSPs ( $68.0 \pm 4.44\%$ ,  $n/N= 26/20$  slices/mice). (C) 10 min pretreatment of the PLD<sub>1,2</sub> inhibitor ML299 (2  $\mu$ M), followed by a 10 min co-application of ML299 and 50  $\mu$ M CCh, blocked CCh-LTD ( $93.8 \pm 6.74\%$ ,  $n/N= 21/10$ ). (D) Bath application of the PLD<sub>1</sub>-specific inhibitor VU0359595 (370 nM) blocked CCh-LTD ( $101 \pm 10.1\%$ ,  $n/N= 7/6$ ) whereas the PLD<sub>2</sub> selective inhibitor (E) VU0364739 (750 nM) had no effect on CCh-LTD ( $69.3 \pm 13.0$ ,  $n/N= 8/4$ ). (F) Quantification of fEPSP slope 46–50 min following drug washout (shaded area) indicates a significant difference

between 50  $\mu$ M CCh alone and ML299, VU0359595 but not VU0364739 (one-way ANOVA  $F_{3,58} = 5.21$ ;  $p = 0.0029$ , with a post-hoc Dunnett's test using CCh alone as the control group, \*  $p < 0.05$ , \*\* $p < 0.01$ ). (G) Left: Time course graph showing that bath application of 100  $\mu$ M CCh induces LTD in littermate controls ( $59.6 \pm 6.06$  n/N= 9/6) but not PLD<sub>1</sub> KO mice ( $92.2 \pm 3.21$ , n/N= 9/6). Right: sample traces for PLD<sub>1</sub> KO animals (Top) and littermate controls (Bottom). (H) Quantification of fEPSP slope 46–50 min following drug washout (shaded area) indicates a significant difference between genotype (Student's t-test;  $p = 0.0002$ , \*\*\* $p < 0.001$ ). (I) Bath application of the group II metabotropic glutamate receptor agonist LY379268 (200 nM) for 10 min induces a robust LTD of fEPSP slope in PLD<sub>1</sub> KO mice ( $59.4 \pm 11.4\%$ , n/N = 5/3). (J) Summary bar graph indicates no significant different between PLD<sub>1</sub> KO mice and littermate controls ( $55.7 \pm 11.6\%$ , n/N = 7/3; Student's t-test;  $p = 0.828$ ). Inset shows representative fEPSP traces for each condition for baseline (red trace) and 50 min after CCh washout (black trace). Scale bars denote 0.25 mV and 5 ms. Data are expressed as mean  $\pm$  SEM.

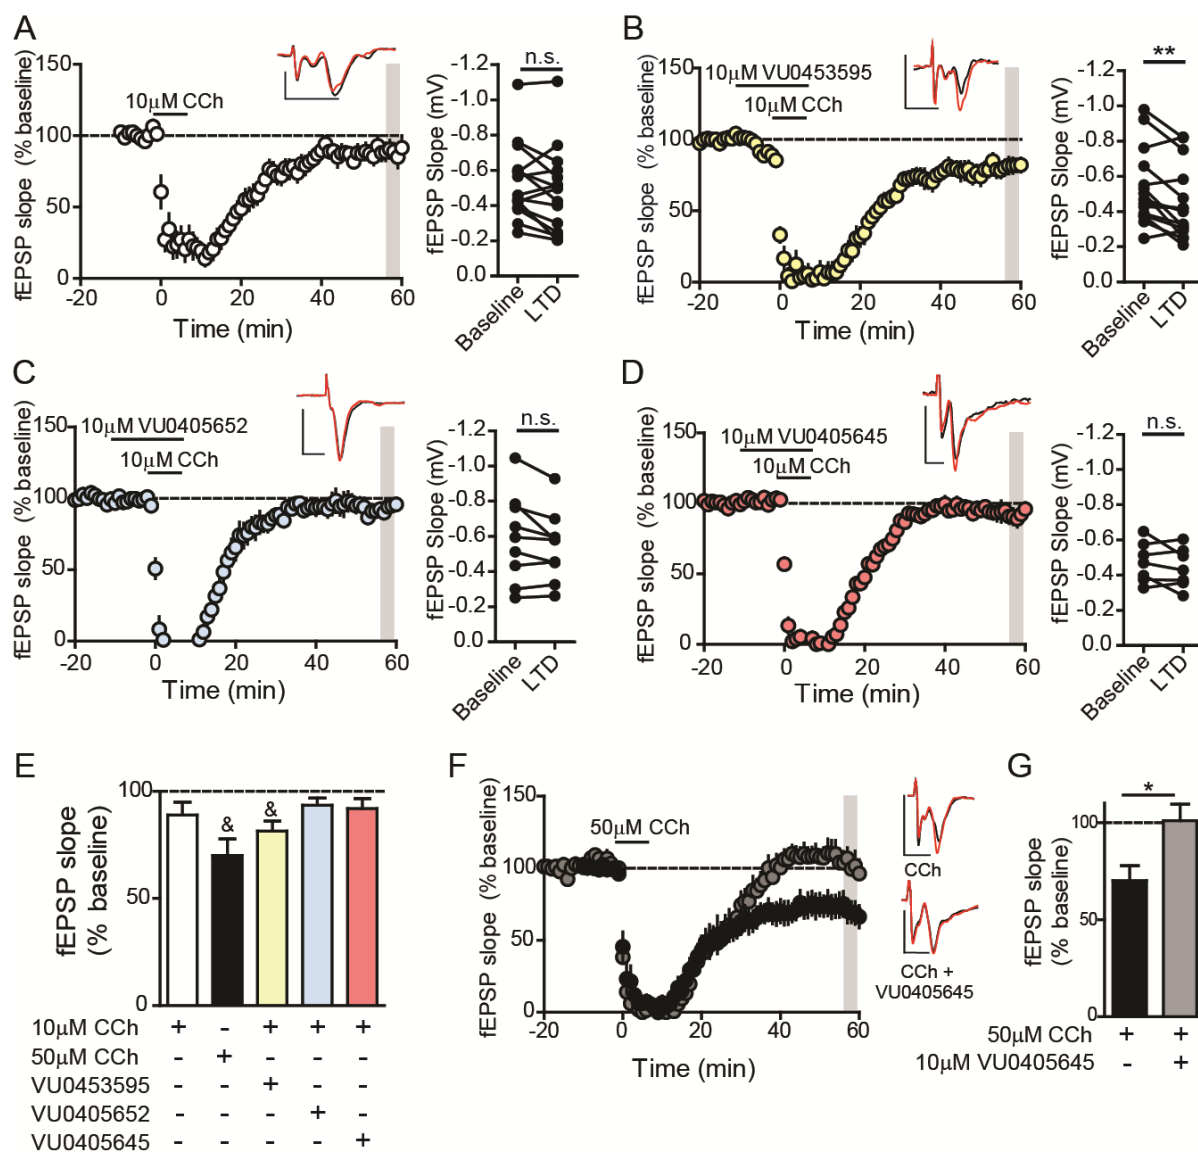

**Figure 3:** Biased  $M_1$  PAMs fail to potentiate a submaximal mLTD in the mPFC and actively block CCh-LTD. (A) Time course graph showing that bath application of 10  $\mu$ M carbachol (CCh) induces a minimal long-term depression (LTD) of fEPSPs ( $88.9 \pm 6.05$ ,  $n/N= 15/13$  slices/mice). Comparison of fEPSPs during baseline and 46-50 min after drug washout (shaded area) reveals no significant difference (paired t-test;  $p > 0.05$ ). (B) 10 min pretreatment of the nonbiased  $M_1$  PAM VU0453595 (10  $\mu$ M), followed by a 10 min co-application of VU0453595 + 10  $\mu$ M CCh, produced a significant LTD ( $81.5 \pm 4.70\%$ ,  $n/N= 14/11$ ; paired t-test  $p = 0.01$ ). Neither (C) VU0405652 (10  $\mu$ M) ( $93.5 \pm 3.28\%$ ,  $n/N= 9/8$ ; paired t-test;  $p > 0.05$ ) nor (D) VU0405645 (10  $\mu$ M)

( $91.9 \pm 4.67\%$ ,  $n/N= 7/7$ ; paired t-test;  $p > 0.05$ ) induced a significant LTD. (E) Summary of the last 5 min of the recordings from the time course experiments ( $\& = p < 0.05$ , paired t-test). (F) A high concentration of CCh ( $50 \mu\text{M}$ , black) induces a LTD of fEPSPs ( $70.0 \pm 7.78\%$ ,  $n/N= 9/7$ ; paired t-test  $p = 0.003$ ) whereas VU0405645 ( $10 \mu\text{M}$ , gray) blocked CCh ( $50 \mu\text{M}$ ) induced LTD of fEPSPs ( $101 \pm 8.59\%$ ,  $n/N= 11/8$ ; paired t-test;  $p > 0.05$ ). (G) Summary of the last 5 min of the recordings from the time course experiments reveals a significant difference between CCh ( $50 \mu\text{M}$ ) alone and CCh ( $50 \mu\text{M}$ ) in the presence of VU0405645 ( $10 \mu\text{M}$ ) (Student's t-test;  $p = 0.017$ ). Insets in panel A, B, C, D and F show representative fEPSP traces for each condition for baseline (red trace) and 50 min after CCh washout (black trace), and scale bars denote 0.5 mV and 5 ms. Data are expressed as mean  $\pm$  SEM. \*  $p < 0.05$ , \*\* $p < 0.01$ .

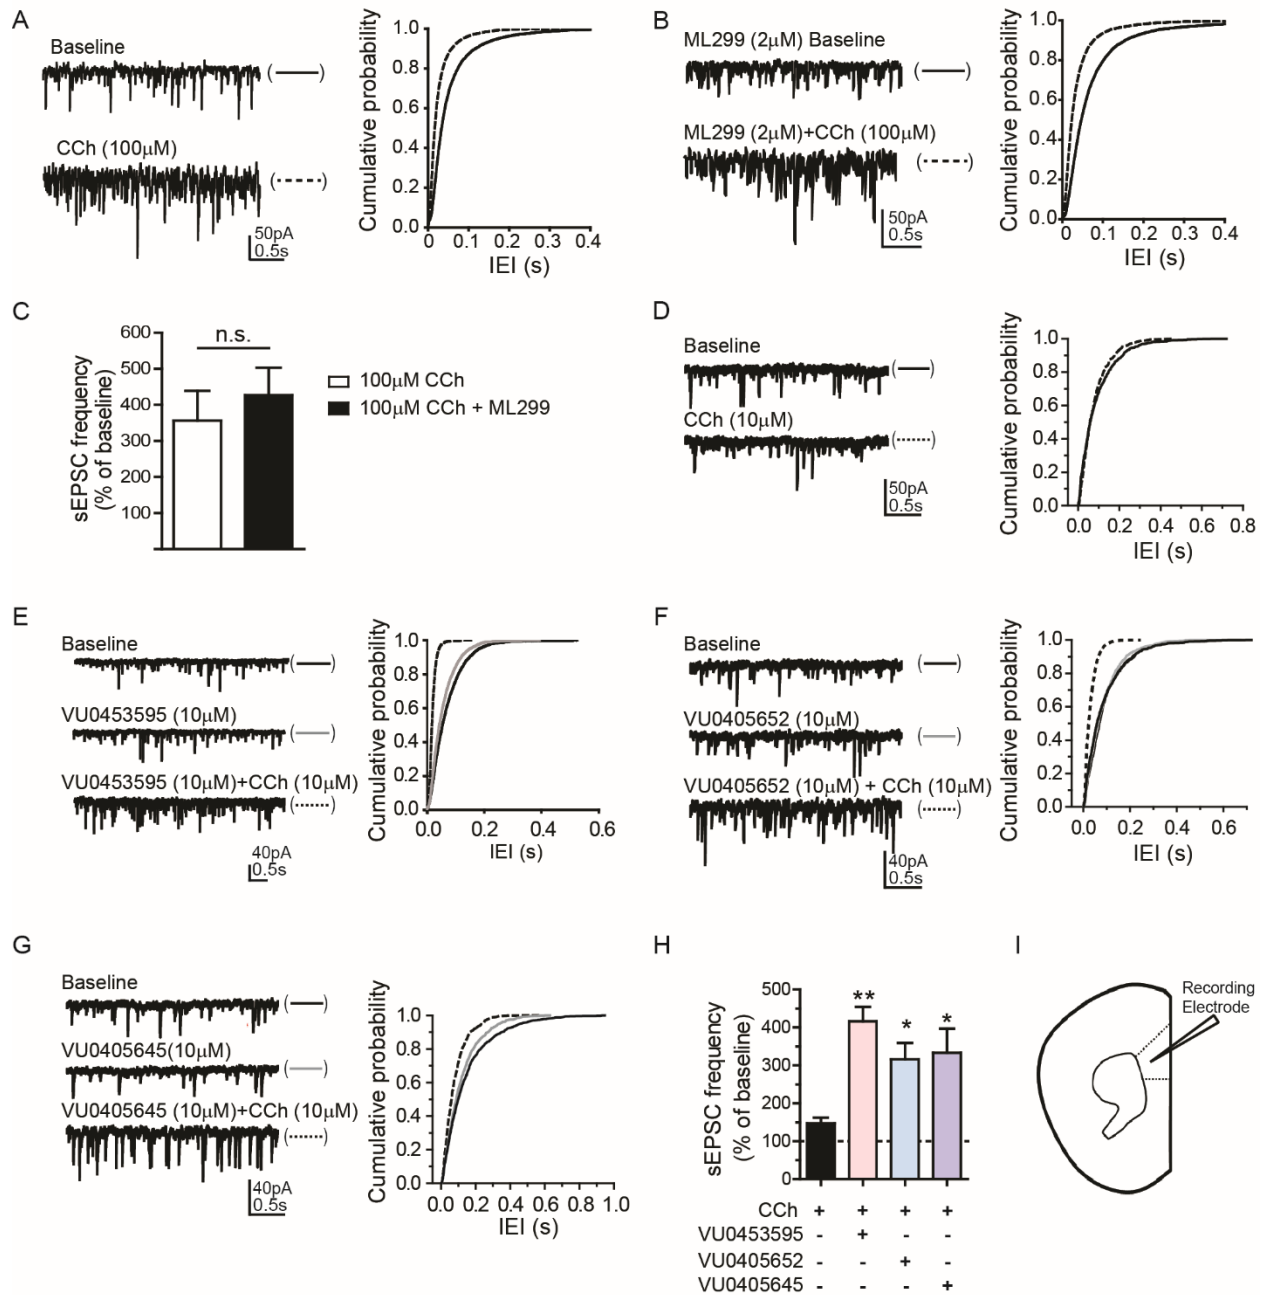

**Figure 4:** PLD is not required for  $M_1$ -dependent increase in sEPSC frequency in mPFC layer V pyramidal neurons and both biased and nonbiased  $M_1$  PAMs can potentiate this response. (A) Sample traces (left) and the cumulative probability of interevent interval (IEI) (right) of sEPSCs in baseline) and during application of 100 μM CCh as indicated for a typical cell. (B) Sample traces (left) and the IEI cumulative probability (right) of sEPSCs in baseline with PLD<sub>1,2</sub> inhibitor ML299

(2  $\mu$ M) and during application of a combination of ML299 and CCh (100  $\mu$ M) for a typical cell. (C) Summary bar graph demonstrates no significant difference in increases in sEPSC frequency between CCh alone ( $357.0 \pm 81.6\%$ ,  $n/N = 7/3$  cells/animals) and CCh in the presence of ML299 ( $427.0 \pm 76.5\%$ ,  $n/N = 8/3$ ) (Student's t-test;  $p > 0.05$ ). (D) Sample traces (left) and IEI cumulative probability (right) of sEPSCs in baseline and during application of 10  $\mu$ M CCh from a typical cell. (E-G) Sample traces (left) and IEI cumulative probability (right) of sEPSCs in baseline, during application of a PAM) and the PAM with CCh as indicated for typical cells are shown. (H) Quantification of the peak effect on sEPSC frequency indicates a statistically significant difference between 10  $\mu$ M CCh alone ( $147 \pm 15.4\%$ ,  $n/N = 7/3$ ), CCh with VU0453595 (10  $\mu$ M) ( $416 \pm 38.2\%$ ,  $n/N = 8$ ), CCh with VU0405652 (10  $\mu$ M) ( $316 \pm 43.3\%$ ,  $n/N = 10$ ), and CCh with VU0405645 (10  $\mu$ M) ( $332.4 \pm 63.7\%$ ,  $n/N = 11$ ). One-way ANOVA  $F_{3,35} = 5.77$ ;  $p = 0.0026$ , with a post-hoc Dunnett's test using CCh alone as the control group, \*  $p < 0.05$ , \*\*  $p < 0.01$ . Data are expressed as mean  $\pm$  SEM. (I) Schematic of whole-cell recordings from mPFC layer V pyramidal neurons (regular spiking cells) clamped at  $-70$  mV.



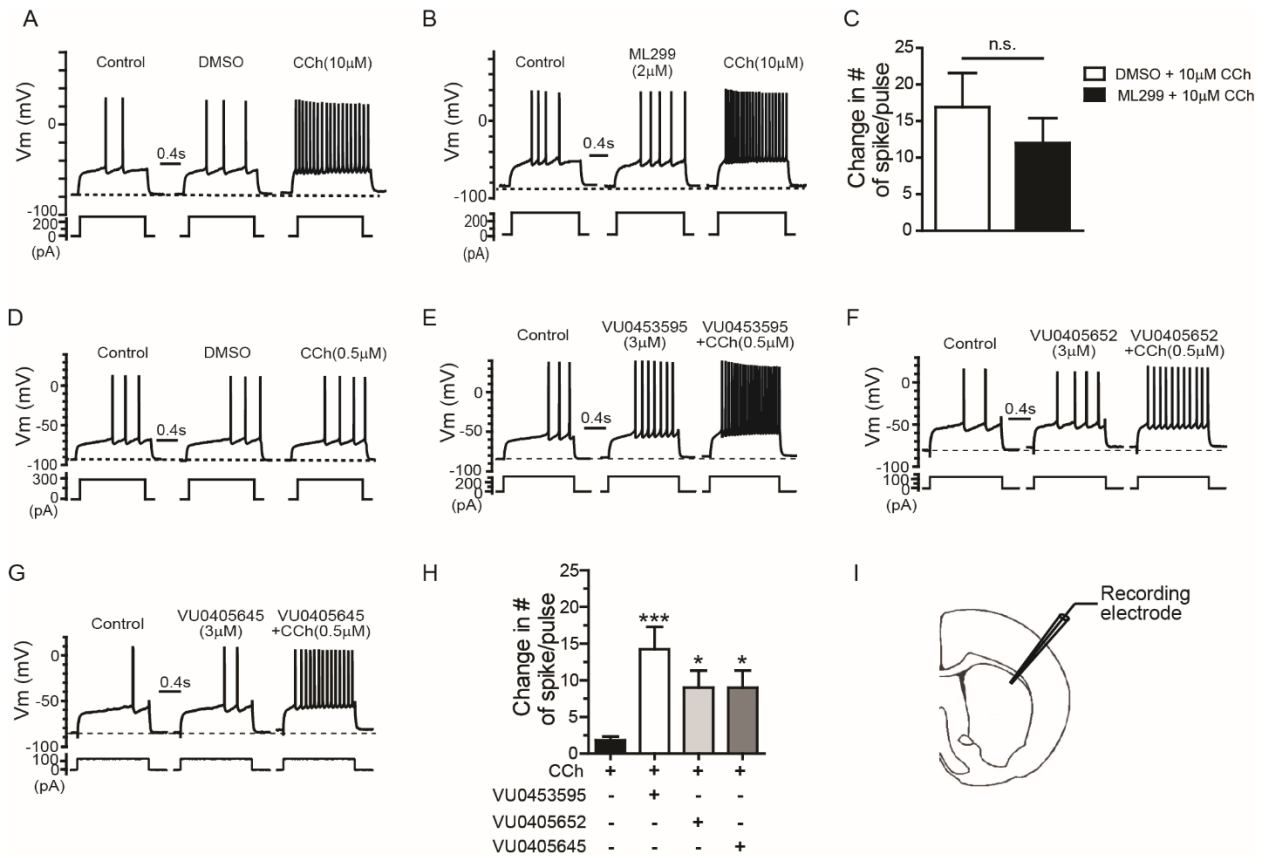

**Figure 5:** PLD is not necessary for M<sub>1</sub> effects on excitability of striatal SPNs and both biased and nonbiased M<sub>1</sub> PAMs can potentiate this response. (A-B) Sample traces of membrane potential responses to a depolarization current step from an SPN during baseline, in the presence of DMSO or ML299 (2 μM), then carbachol (10 μM). (C) Bar graph summarizing the changes in the number of spikes per pulse after CCh application in presence of ML299 (12.0 ± 3.38, n/N = 6/5 cells/animal) or DMSO (16.9 ± 4.67, n/N = 5/5) shows no significant difference between groups (Student's t-test; p > 0.05). (D-G) Sample traces of membrane potential responses to a depolarization current step from an SPN during baseline, in the presence of M<sub>1</sub> PAM (10 μM) or DMSO, then M<sub>1</sub> PAM/DMSO + CCh (0.5 μM). (H) Bar graph summarizing the change in the number of spikes per pulse after CCh (0.5 μM) application in presence of DMSO (1.83 ± 0.49, n/N = 9/7), VU0453595 (14.2 ± 3.05, n/N = 6/6), VU0405652 (9.02 ± 2.31, n/N = 7/6) and VU0405645 (9.00 ± 2.37, n/N = 6/5) shows significant increase in the change in number of

spikes/pulse compared to DMSO controls (one-way ANOVA  $F_{3,24} = 6$ ;  $p = 0.0017$ , with a post-hoc Dunnett's test using CCh + DMSO as the control group, \*  $p < 0.05$ , \*\*\*  $p < 0.001$ ). Data are expressed as mean  $\pm$  SEM. (I) Schematic of whole-cell recordings from SPN neurons under current clamp conditions performed in the DLS.
